# Supplementary material for: Thalamic Dysfunction in Schizophrenia Suggested by Whole-Night Deficits in Slow and Fast Spindles
Source: Atypon-hosted journal article supplement (doi:10.1176/appi.ajp.2010.09121731), 2010-09-16
Supplement: ajp_167_11_1339_01.pdf [file ajp_167_11_1339_01.pdf]

**SUPP. TABLE 1. Demographics and clinical ratings of subject groups.**

| Clinical Measures                     | Healthy Controls<br>(n=44) | Schizophrenics<br>(n=49) | Medicated Controls<br>(n=20) | p <sup>a</sup> | p <sup>b</sup> | p <sup>c</sup> |
|---------------------------------------|----------------------------|--------------------------|------------------------------|----------------|----------------|----------------|
| Gender (M/F)                          | 29/15                      | 33/16                    | 5/15                         |                |                |                |
| Age (Mean ± S.D.)                     | 36.7 ± 7.8                 | 38.2 ± 10.6              | 34.75 ± 8.6                  | n.s.           | n.s.           | n.s.           |
| Body Mass Index (BMI)                 | 26.1 ± 5.2                 | 30.8 ± 6.9               | 32.0 ± 7.0                   | <0.01          | <0.01          | n.s.           |
| Antipsychotic dosed (Mean ± S.D.)     |                            | 570 ± 430                | 300 ± 185                    |                |                | <0.01          |
| Benzodiazepines (Number of Subjects)  |                            | 10                       | 5                            |                |                |                |
| Antidepressants (Number of Subjects)  |                            | 22                       | 7                            |                |                |                |
| Mood stabilizers (Number of Subjects) |                            | 11                       | 3                            |                |                |                |
| PANSS Positive (Mean ± S.D.)          |                            | 21.5 ± 4.2               |                              |                |                |                |
| PANSS Negative (Mean ± S.D.)          |                            | 22.3 ± 4.8               |                              |                |                |                |
| PANSS General (Mean ± S.D.)           |                            | 45.2 ± 6.9               |                              |                |                |                |
| PANSS Total (Mean ± S.D.)             |                            | 88.5 ± 12.7              |                              |                |                |                |

<sup>a</sup> One-way ANOVA followed by post-hoc two-tailed unpaired t-test between healthy and schizophrenia groups.

<sup>b</sup> One-way ANOVA followed by post-hoc two-tailed unpaired t-test between healthy and medicated control groups.

<sup>c</sup> One-way ANOVA followed by post-hoc two-tailed unpaired t-test between schizophrenia and medicated control groups.

<sup>d</sup> Chlorpromazine equivalents (mg/day).
